# Supplementary material for: Punctate White Matter Lesions Associated With Altered Brain Development And Adverse Motor Outcome In Preterm Infants
Source: PubMed Central journal article supplement (PMC5643493; doi:10.1038/s41598-017-13753-x), 2017-10-16
Supplement: 41598_2017_13753_MOESM2_ESM.pdf [file 41598_2017_13753_MOESM2_ESM.pdf]

**Punctate White Matter Lesions Associated With Altered Brain Development  
And Adverse Motor Outcome In Preterm Infants**

Nora Tusor<sup>1\*</sup>, Manon J. Benders<sup>2</sup>, Serena J. Counsell<sup>1</sup>, Phumza Nongena<sup>3</sup>, Moegamad A Ederies<sup>3</sup>, Shona Falconer<sup>1</sup>, Andrew Chew<sup>1</sup>, Nuria Gonzalez-Cinca<sup>1</sup>, Joseph V. Hajnal<sup>1</sup>, Sunay Gangadharan<sup>1</sup>, Vasiliki Chatzi<sup>1</sup>, Karina J. Kersbergen<sup>2</sup>, Nigel Kennea<sup>4</sup>, Denis V. Azzopardi<sup>1</sup>, A. David Edwards<sup>1</sup>

**Supplementary video S1 online:** Group level probabilistic punctate white matter lesion map in relation to the corticospinal tracts. 3D movie of the group level probabilistic punctate lesion map (yellow-red) in relation to the corticospinal tracts (blue) displayed on a 40-week T2-weighted neonatal template as in Figure 3.
